# Supplementary material
Source: PubMed Central journal article supplement (PMC6792178)
Supplement: ehp-127-057012-s003.pdf [file ehp-127-057012-s003.pdf]

**Note to readers with disabilities:** *EHP* strives to ensure that all journal content is accessible to all readers. However, some figures and Supplemental Material published in *EHP* articles may not conform to [508 standards](#) due to the complexity of the information being presented. If you need assistance accessing journal content, please contact [ehp508@niehs.nih.gov](mailto:ehp508@niehs.nih.gov). Our staff will work with you to assess and meet your accessibility needs within 3 working days.

### **Supplemental Material**

#### **Prenatal Particulate Air Pollution and DNA Methylation in Newborns: An Epigenome-Wide Meta-Analysis**

Olena Gruzieva, Cheng-Jian Xu, Paul Yousefi, Caroline Relton, Simon Kebede Merid, Carrie V. Breton, Lu Gao, Heather E. Volk, Jason I. Feinberg, Christine Ladd-Acosta, Kelly Bakulski, Charles Auffray, Nathanaël Lemonnier, Michelle Plusquin, Akram Ghantous, Zdenko Herceg, Tim S. Nawrot, Costanza Pizzi, Lorenzo Richiardi, Franca Rusconi, Paolo Vineis, Manolis Kogevinas, Janine F. Felix, Liesbeth Duijts, Herman T. den Dekker, Vincent W. V. Jaddoe, José L. Ruiz, Mariona Bustamante, Josep Maria Antó, Jordi Sunyer, Martine Vrijheid, Kristine B. Gutzkow, Regina Grazuleviciene, Carles Hernandez-Ferrer, Isabella Annesi-Maesano, Johanna Lepeule, Jean Bousquet, Anna Bergström, Inger Kull, Cilla Söderhäll, Juha Kere, the Biobank-based Integrative Omics Studies (BIOS) Consortium, Ulrike Gehring, Bert Brunekreef, Allan C. Just, Rosalind J. Wright, Cheng Peng, Diane R. Gold, Itai Kloog, Dawn L. DeMeo, Göran Pershagen, Gerard H. Koppelman, Stephanie J. London, Andrea A. Baccarelli, and Erik Melén

#### **Table of Contents**

##### **Materials and Methods**

**Table S1.** Input parameters for DMR calling.

**Table S2.** Characteristics of cohorts included in the discovery EWAS meta-analysis.

**Table S3.** Study-specific lambda values.

**Table S4.** DMRs in relation to prenatal PM<sub>2.5</sub> exposure that overlap between DMRcate and comb-p methods.

**Table S5.** Statistically significant CpGs (FDR  $p < 0.05$ ) associated with IQR increases in prenatal PM<sub>10</sub> (5.6 µg/m<sup>3</sup>) exposure and DNA methylation in newborns (Discovery meta-analysis), and replication analyses in children (age 7–9 years) using concurrent PM<sub>10</sub> exposure at the time of biosampling.

**Table S6.** Correlation analysis of DNA methylation and gene transcription levels in *cis* using the BIOS data (n=3,075).

**Table S7.** Distribution of expression levels of genes associated with CpG methylation in response to maternal PM<sub>10</sub> or PM<sub>2.5</sub> exposure in newborn children of the EARLI cohort.

**Table S8.** Distribution of gene expression levels of genes associated with CpG methylation in response to maternal PM<sub>10</sub> or PM<sub>2.5</sub> exposure in 16-year-old children of the BAMSE cohort.

**Table S9.** Top 10 significant gene ontology terms derived from pathway analysis based on CpGs significantly associated with prenatal PM<sub>10</sub> exposure in the discovery meta-analysis at a cut-off of  $P < 10^{-5}$  using missMethyl method.

**Figure S1.** Quantile-quantile plot for epigenome-wide meta-analysis of the association between A) prenatal PM<sub>10</sub> (n=1,949) and B) prenatal PM<sub>2.5</sub> exposure (n=1,551) and cord blood DNA methylation.

**Figure S2.** Forest plots for six epigenome-wide significant associations between prenatal PM<sub>10</sub> exposure and cord blood DNA methylation.

**Excel Table S1.** Statistically significant DMRs (FDR  $p < 0.01$ ) in relation to prenatal PM<sub>10</sub> exposure identified by the DMRcate method.

**Excel Table S2.** Statistically significant DMRs (FDR  $p < 0.01$ ) in relation to prenatal PM<sub>10</sub> exposure identified by the comb\_p method.

**Excel Table S3.** Statistically significant DMRs (FDR  $p < 0.01$ ) in relation to prenatal PM<sub>2.5</sub> exposure identified by the DMRcate method.

**Excel Table S4.** Statistically significant DMRs (FDR  $p < 0.01$ ) in relation to prenatal PM<sub>2.5</sub> exposure identified by the comb\_p method.

**Additional File-** Excel Document

**References**
